# Supplementary material for: PD-1 blockade potentiates neoadjuvant chemotherapy in NSCLC via increasing CD127+ and KLRG1+ CD8 T cells
Source: PubMed Central journal article supplement (PMC10213055; doi:10.1038/s41698-023-00384-x), 2023-05-25
Supplement: 41698_2023_384_MOESM1_ESM.pdf [file 41698_2023_384_MOESM1_ESM.pdf]

**Supplementary Table 1. Clinicopathological information, cell counts and response to neoadjuvant therapy for single-cell sequencing patients.**

| Patient | Age | Sex    | Therapy | Cell counts | Pathology | RVT% | Pathologic response |
|---------|-----|--------|---------|-------------|-----------|------|---------------------|
| P01     | 68  | Male   | NAC     | 4057        | SCC       | 40%  | non-MPR             |
| P02     | 69  | Male   | NAPC    | 3045        | SCC       | 90%  | non-MPR             |
| P03     | 51  | Female | NAPC    | 2182        | SCC       | 0%   | MPR                 |
| P04     | 66  | Female | NAPC    | 2888        | AD        | 80%  | non-MPR             |
| P05     | 67  | Male   | NAPC    | 4474        | SCC       | 0%   | MPR                 |
| P06     | 62  | Male   | NAPC    | 7579        | SCC       | 0%   | MPR                 |
| P07     | 46  | Male   | NAPC    | 2636        | AD        | 60%  | non-MPR             |

RVT, residual viable tumor cells; SCC, squamous cell carcinoma; AD, adenocarcinoma; MPR, major pathological response; NAC, neoadjuvant chemotherapy; NAPC, neoadjuvant pembrolizumab and chemotherapy.

**Supplementary Table 2. Signature genes of B cell, CD4 and CD8 subpopulations in GSEA analysis.**

| Cell types                             | Genes included in signature                                            |
|----------------------------------------|------------------------------------------------------------------------|
| B cells                                | CD19, MS4A1, CD79A, CD79B                                              |
| Naïve CD4 <sup>+</sup> T cells         | CD4, LEF1, TCF7                                                        |
| Memory CD4 <sup>+</sup> T cells        | CD4, CD27, CCR7, IL7R                                                  |
| Treg cells                             | CD4, IL2RA, FOXP3, CCR8, LAYN, CTLA4, TNFRSF9, TNFRSF18, MAGEH1, IKZF2 |
| Naïve CD8 <sup>+</sup> T cells         | CD8A, CD8B, CD45RA, LEF1, TCF7                                         |
| Memory CD8 <sup>+</sup> T cells        | CD8A, CD8B, CD45RO, CD27, CD62L, CCR7, IL7R                            |
| Effector CD8 <sup>+</sup> T cells      | CD8A, CD8B, KLRG1, IFNG, GZMK, GZMB, PRF1, TBX21                       |
| Exhausted CD8 <sup>+</sup> T cells     | CD8A, CD8B, PDCD1, CTLA4, TOX, HAVCR2, ENTPD1, LAYN, LAG3              |
| Proliferating CD8 <sup>+</sup> T cells | CD8A, CD8B, STMN1, TUBB, MKI67                                         |

**Supplementary Table 3. Signature genes used to define functional status in T cells.**

| naïve | exhaustion | cytotoxic | inflammatory | effector | regulatory |
|-------|------------|-----------|--------------|----------|------------|
| CCR7  | HAVCR2     | PRF1      | IRF1         | GZMA     | TNFRSF9    |
| TCF7  | CXCL13     | IFNG      | CD8A         | GZMB     | FOXP3      |
| LEF1  | CCL3       | GNLY      | CCL2         | PRF1     | CTLA4      |
| SELL  | SIRPG      | NKG7      | CCL3         | EOMES    | CCR8       |
|       | IFNG       | GZMB      | CCL4         | IFNG     | ADORA2A    |
|       | TIGIT      | GZMA      | CXCL9        | TNF      | REL        |
|       | GZMB       | GZMH      | CXCL10       | CXCL9    | TGFB1      |
|       | PDCD1      | KLRK1     | ICOS         | CXCL10   | HELIOS     |
|       | PARK7      | KLRB1     | GZMK         | CD8A     |            |
|       | TNFRSF9    | KLRD1     | HLA-DMA      | CD4      |            |
|       | ACP5       | CTSW      | HLA-DMB      | FOXP3    |            |
|       | CTLA4      | CST7      | HLA-DOA      | ICOS     |            |
|       | RBPJ       |           | HLA-DOB      | CTLA4    |            |
|       | MIR155     |           |              |          |            |
|       | CXCR6      |           |              |          |            |
|       | CD27       |           |              |          |            |
|       | FKBP1A     |           |              |          |            |
|       | BST2       |           |              |          |            |
|       | TPI1       |           |              |          |            |
|       | MIR155HG   |           |              |          |            |
|       | PTTG1      |           |              |          |            |
|       | CD63       |           |              |          |            |
|       | SAMSN1     |           |              |          |            |
|       | RGS1       |           |              |          |            |
|       | CD27-AS1   |           |              |          |            |
|       | ITGAE      |           |              |          |            |
|       | MIR4632    |           |              |          |            |
|       | HLA-DRA    |           |              |          |            |
|       | IGFLR1     |           |              |          |            |
|       | KRT86      |           |              |          |            |
|       | ENTPD1     |           |              |          |            |
|       | DUSP4      |           |              |          |            |
|       | SIT1       |           |              |          |            |
|       | TOX        |           |              |          |            |
|       | PHLDA1     |           |              |          |            |
|       | CCND2      |           |              |          |            |
|       | GPR25      |           |              |          |            |
|       | LAYN       |           |              |          |            |
|       | PRDX5      |           |              |          |            |

|  |               |  |  |  |  |
|--|---------------|--|--|--|--|
|  | SARDH         |  |  |  |  |
|  | FASLG         |  |  |  |  |
|  | MIR3917       |  |  |  |  |
|  | ANXA5         |  |  |  |  |
|  | CTSD          |  |  |  |  |
|  | PDIA6         |  |  |  |  |
|  | RANBP1        |  |  |  |  |
|  | FKBP1A-SDCBP2 |  |  |  |  |
|  | COTL1         |  |  |  |  |
|  | TNFRSF1B      |  |  |  |  |
|  | IDH2          |  |  |  |  |
|  | CD38          |  |  |  |  |
|  | CD82          |  |  |  |  |
|  | LAG3          |  |  |  |  |
|  | MIR497HG      |  |  |  |  |
|  | APOBEC3C      |  |  |  |  |
|  | ITM2A         |  |  |  |  |
|  | COX5A         |  |  |  |  |
|  | IFI35         |  |  |  |  |
|  | NDFIP2        |  |  |  |  |
|  | TNFRSF18      |  |  |  |  |
|  | KRT81         |  |  |  |  |
|  | DNPH1         |  |  |  |  |
|  | RGS2          |  |  |  |  |
|  | HMGN1         |  |  |  |  |
|  | DYNLL1        |  |  |  |  |
|  | SNRPB         |  |  |  |  |
|  | STRA13        |  |  |  |  |
|  | SYNGR2        |  |  |  |  |
|  | RAB27A        |  |  |  |  |
|  | PSMC3         |  |  |  |  |
|  | GALM          |  |  |  |  |
|  | FABP5         |  |  |  |  |
|  | UBE2L6        |  |  |  |  |
|  | MYO7A         |  |  |  |  |
|  | PRDX3         |  |  |  |  |
|  | DDIT4         |  |  |  |  |
|  | STMN1         |  |  |  |  |
|  | CDK2AP2       |  |  |  |  |
|  | VCAM1         |  |  |  |  |
|  | SNAP47        |  |  |  |  |
|  | PSMB3         |  |  |  |  |
|  | ISG15         |  |  |  |  |

|  |          |  |  |  |  |
|--|----------|--|--|--|--|
|  | HLA-DRB5 |  |  |  |  |
|  | CKS2     |  |  |  |  |
|  | TNIP3    |  |  |  |  |
|  | CD7      |  |  |  |  |
|  | PSMD4    |  |  |  |  |
|  | ATP6V1C2 |  |  |  |  |
|  | PSMD8    |  |  |  |  |
|  | HLA-DRB6 |  |  |  |  |

**Supplementary Table 4. Spearman correlation of PD-L1 and TILs in pre-NAPC and post-NAPC.**

| <b>1.Spearman correlation of PD-L1 and TILs in pre-NAPC.</b> |                                    |                                    |                                     |                                                       |                                                       |                                                       |                                                       |
|--------------------------------------------------------------|------------------------------------|------------------------------------|-------------------------------------|-------------------------------------------------------|-------------------------------------------------------|-------------------------------------------------------|-------------------------------------------------------|
| <b>Correlation</b>                                           | PD-L1 vs. CD4 <sup>+</sup> T cells | PD-L1 vs. CD8 <sup>+</sup> T cells | PD-L1 vs. CD20 <sup>+</sup> T cells | PD-L1 vs. CD4 <sup>+</sup> CD127 <sup>+</sup> T cells | PD-L1 vs. CD4 <sup>+</sup> FoxP3 <sup>+</sup> T cells | PD-L1 vs. CD8 <sup>+</sup> CD127 <sup>+</sup> T cells | PD-L1 vs. CD8 <sup>+</sup> KLRG1 <sup>+</sup> T cells |
| <b>Spearman r</b>                                            |                                    |                                    |                                     |                                                       |                                                       |                                                       |                                                       |
| r                                                            | 0.4577                             | 0.1972                             | 0.325                               | 0.2108                                                | 0.1882                                                | 0.09787                                               | -0.13                                                 |
| <b>P value</b>                                               |                                    |                                    |                                     |                                                       |                                                       |                                                       |                                                       |
| P (two-tailed)                                               | 0.0561                             | 0.4328                             | 0.1882                              | 0.4011                                                | 0.4547                                                | 0.6993                                                | 0.6071                                                |
| P value summary                                              | ns                                 | ns                                 | ns                                  | ns                                                    | ns                                                    | ns                                                    | ns                                                    |
| Exact or approximate                                         | Approximate                        | Approximate                        | Approximate                         | Approximate                                           | Approximate                                           | Approximate                                           | Approximate                                           |
| Significant? (alpha)                                         | No                                 | No                                 | No                                  | No                                                    | No                                                    | No                                                    | No                                                    |

| <b>2.Spearman correlation of PD-L1 and TILs in post-NAPC.</b> |                                    |                                    |                                     |                                                       |                                                       |                                                       |                                                       |
|---------------------------------------------------------------|------------------------------------|------------------------------------|-------------------------------------|-------------------------------------------------------|-------------------------------------------------------|-------------------------------------------------------|-------------------------------------------------------|
| <b>Correlation</b>                                            | PD-L1 vs. CD4 <sup>+</sup> T cells | PD-L1 vs. CD8 <sup>+</sup> T cells | PD-L1 vs. CD20 <sup>+</sup> T cells | PD-L1 vs. CD4 <sup>+</sup> CD127 <sup>+</sup> T cells | PD-L1 vs. CD4 <sup>+</sup> FoxP3 <sup>+</sup> T cells | PD-L1 vs. CD8 <sup>+</sup> CD127 <sup>+</sup> T cells | PD-L1 vs. CD8 <sup>+</sup> KLRG1 <sup>+</sup> T cells |
| <b>Spearman r</b>                                             |                                    |                                    |                                     |                                                       |                                                       |                                                       |                                                       |
| r                                                             | -0.0729                            | -0.0577                            | 0.0354                              | -0.1254                                               | 0.1698                                                | -0.08522                                              | -0.1048                                               |
| <b>P value</b>                                                |                                    |                                    |                                     |                                                       |                                                       |                                                       |                                                       |
| P (two-tailed)                                                | 0.7236                             | 0.7794                             | 0.8637                              | 0.5415                                                | 0.4071                                                | 0.6789                                                | 0.6104                                                |
| P value summary                                               | ns                                 | ns                                 | ns                                  | ns                                                    | ns                                                    | ns                                                    | ns                                                    |
| Exact or approximate                                          | Approximate                        | Approximate                        | Approximate                         | Approximate                                           | Approximate                                           | Approximate                                           | Approximate                                           |
| Significant? (alpha)                                          | No                                 | No                                 | No                                  | No                                                    | No                                                    | No                                                    | No                                                    |

**Supplementary Table 5. Spearman correlation of tumor size at surgery and TILs in NAC and NAPC.**

**1.Spearman correlation of tumor size at surgery and TILs in NAC.**

| <b>Correlation</b> | Tumor size (cm) vs. CD4 <sup>+</sup> T cells | Tumor size (cm) vs. CD8 <sup>+</sup> T cells | Tumor size (cm) vs. CD20 <sup>+</sup> T cells | Tumor size (cm) vs. CD4 <sup>+</sup> CD127 <sup>+</sup> T cells | Tumor size (cm) vs. CD4 <sup>+</sup> FoxP3 <sup>+</sup> T cells | Tumor size (cm) vs. CD8 <sup>+</sup> CD127 <sup>+</sup> T cells | Tumor size (cm) vs. CD8 <sup>+</sup> KLRG1 <sup>+</sup> T cells |
|--------------------|----------------------------------------------|----------------------------------------------|-----------------------------------------------|-----------------------------------------------------------------|-----------------------------------------------------------------|-----------------------------------------------------------------|-----------------------------------------------------------------|
| <b>Spearman r</b>  |                                              |                                              |                                               |                                                                 |                                                                 |                                                                 |                                                                 |
| r                  | -0.3843                                      | -0.0957                                      | -0.1738                                       | -0.3945                                                         | -0.4001                                                         | -0.2371                                                         | -0.3149                                                         |
| <b>P value</b>     |                                              |                                              |                                               |                                                                 |                                                                 |                                                                 |                                                                 |
| P (two-tailed)     | 0.036                                        | 0.6148                                       | 0.3584                                        | 0.031                                                           | 0.0285                                                          | 0.2071                                                          | 0.0901                                                          |
| P value summ       | *                                            | ns                                           | ns                                            | *                                                               | *                                                               | ns                                                              | ns                                                              |
| Exact or approx    | Approximate                                  | Approximate                                  | Approximate                                   | Approximate                                                     | Approximate                                                     | Approximate                                                     | Approximate                                                     |
| Significant? (a)   | Yes                                          | No                                           | No                                            | Yes                                                             | Yes                                                             | No                                                              | No                                                              |

**2.Spearman correlation of tumor size at surgery and TILs in NAPC.**

| <b>Correlation</b> | Tumor size (cm) vs. CD4 <sup>+</sup> T cells | Tumor size (cm) vs. CD8 <sup>+</sup> T cells | Tumor size (cm) vs. CD20 <sup>+</sup> T cells | Tumor size (cm) vs. CD4 <sup>+</sup> CD127 <sup>+</sup> T cells | Tumor size (cm) vs. CD4 <sup>+</sup> FoxP3 <sup>+</sup> T cells | Tumor size (cm) vs. CD8 <sup>+</sup> CD127 <sup>+</sup> T cells | Tumor size (cm) vs. CD8 <sup>+</sup> KLRG1 <sup>+</sup> T cells |
|--------------------|----------------------------------------------|----------------------------------------------|-----------------------------------------------|-----------------------------------------------------------------|-----------------------------------------------------------------|-----------------------------------------------------------------|-----------------------------------------------------------------|
| <b>Spearman r</b>  |                                              |                                              |                                               |                                                                 |                                                                 |                                                                 |                                                                 |
| r                  | -0.1446                                      | -0.1627                                      | -0.3141                                       | 0.01558                                                         | -0.2608                                                         | 0.0187                                                          | -0.1081                                                         |
| <b>P value</b>     |                                              |                                              |                                               |                                                                 |                                                                 |                                                                 |                                                                 |
| P (two-tailed)     | 0.4718                                       | 0.4175                                       | 0.1105                                        | 0.9385                                                          | 0.1888                                                          | 0.9262                                                          | 0.5913                                                          |
| P value summ       | ns                                           | ns                                           | ns                                            | ns                                                              | ns                                                              | ns                                                              | ns                                                              |
| Exact or approx    | Approximate                                  | Approximate                                  | Approximate                                   | Approximate                                                     | Approximate                                                     | Approximate                                                     | Approximate                                                     |
| Significant? (a)   | No                                           | No                                           | No                                            | No                                                              | No                                                              | No                                                              | No                                                              |

**Supplementary Table 6. Mean percentage of TILs before and after NAC with different chemotherapy regimens.**

| TILs                                | Pre-NAC |         |         | Post-NAC     |              |               |
|-------------------------------------|---------|---------|---------|--------------|--------------|---------------|
|                                     | PTX+CBP | PEM+CBP | p value | PTX+CBP      | PEM+CBP      | p value       |
|                                     | (N=12)  | (N=4)   |         | (N=18)       | (N=12)       |               |
| CD20 <sup>+</sup>                   | 0.7000  | 0.5400  | 0.7703  | 14.95        | 9.315        | 0.5732        |
| CD4 <sup>+</sup>                    | 8.795   | 10.05   | 0.6835  | 14.87        | 16.44        | 0.1236        |
| CD4 <sup>+</sup> CD127 <sup>+</sup> | 1.560   | 2.350   | 0.8615  | <b>2.104</b> | <b>3.898</b> | <b>0.0116</b> |
| CD4 <sup>+</sup> FOXP3 <sup>+</sup> | 0.8100  | 1.265   | 0.7703  | 1.754        | 2.252        | 0.3048        |
| CD8 <sup>+</sup>                    | 5.060   | 5.930   | 0.2016  | 8.300        | 6.495        | 0.2852        |
| CD8 <sup>+</sup> CD127 <sup>+</sup> | 0.2950  | 0.6600  | 0.7703  | 0.3443       | 0.4124       | 0.6021        |
| CD8 <sup>+</sup> KLRG1 <sup>+</sup> | 0.3650  | 0.1950  | 0.5429  | 0.6545       | 0.5059       | 0.3684        |

Data was presented with median, p values were determined by Mann-Whitney test. NAC, neoadjuvant chemotherapy; NAPC, neoadjuvant pembrolizumab and chemotherapy; TILs, tumor-infiltrating lymphocytes; PTX, paclitaxel; CBP, carboplatin; PEM, pemetrexed.



**Supplementary Table 7. Mean percentage of TILs before and after NACP with different chemotherapy regimens.**

| TILs                                | Pre-NACP |         | p value | Post-NACP |         | p value |
|-------------------------------------|----------|---------|---------|-----------|---------|---------|
|                                     | PTX+CBP  | PEM+CBP |         | PTX+CBP   | PEM+CBP |         |
|                                     | (N=16)   | (N=7)   |         | (N=23)    | (N=7)   |         |
| CD20 <sup>+</sup>                   | 0.6800   | 0.5500  | 0.6822  | 19.90     | 14.37   | 0.3107  |
| CD4 <sup>+</sup>                    | 7.760    | 9.410   | 0.2776  | 19.53     | 21.22   | 0.8480  |
| CD4 <sup>+</sup> CD127 <sup>+</sup> | 1.330    | 0.720   | 0.4510  | 5.013     | 6.273   | 0.8107  |
| CD4 <sup>+</sup> FOXP3 <sup>+</sup> | 0.5050   | 1.180   | 0.1918  | 1.905     | 1.560   | 0.5975  |
| CD8 <sup>+</sup>                    | 4.740    | 4.380   | 0.8195  | 15.78     | 11.72   | 0.3347  |
| CD8 <sup>+</sup> CD127 <sup>+</sup> | 0.2250   | 0.1600  | 0.6599  | 1.036     | 0.5444  | 0.1901  |
| CD8 <sup>+</sup> KLRG1 <sup>+</sup> | 0.1400   | 0.3000  | 0.4405  | 1.389     | 1.473   | 0.9618  |

Data was presented with median, p values were determined by Mann-Whitney test. NAC, neoadjuvant chemotherapy; NACP, neoadjuvant pembrolizumab and chemotherapy; TILs, tumor-infiltrating lymphocytes; PTX, paclitaxel; CBP, carboplatin; PEM, pemetrexed.

**Supplementary Table 8. Primary antibodies Information for mIHC staining of pre- and post-therapy FFPE slides from NSCLC patients treated with NAC or NAPC.**

| Antibodies                            | Source | Identifier  | Diluted concentration | Fluorescent channel |
|---------------------------------------|--------|-------------|-----------------------|---------------------|
| Rabbit monoclonal anti-CD4 antibody   | Abcam  | ab133616    | 1:1000                | PPD520              |
| Rabbit monoclonal anti-CD127 antibody | Abcam  | ab259806    | 1:1500                | PPD540              |
| Mouse monoclonal anti-FOXP3 antibody  | Abcam  | ab20034     | 1: 400                | PPD570              |
| Rabbit monoclonal anti-KLRG1 antibody | R&D    | MAB70293-SP | 1: 400                | PPD620              |
| Rabbit monoclonal anti-CD8 antibody   | Abcam  | Ab237710    | 1: 800                | PPD650              |
| Rabbit monoclonal anti-CD20 antibody  | Abcam  | ab78237     | 1:1000                | PPD690              |

## Supplementary Figures and legends

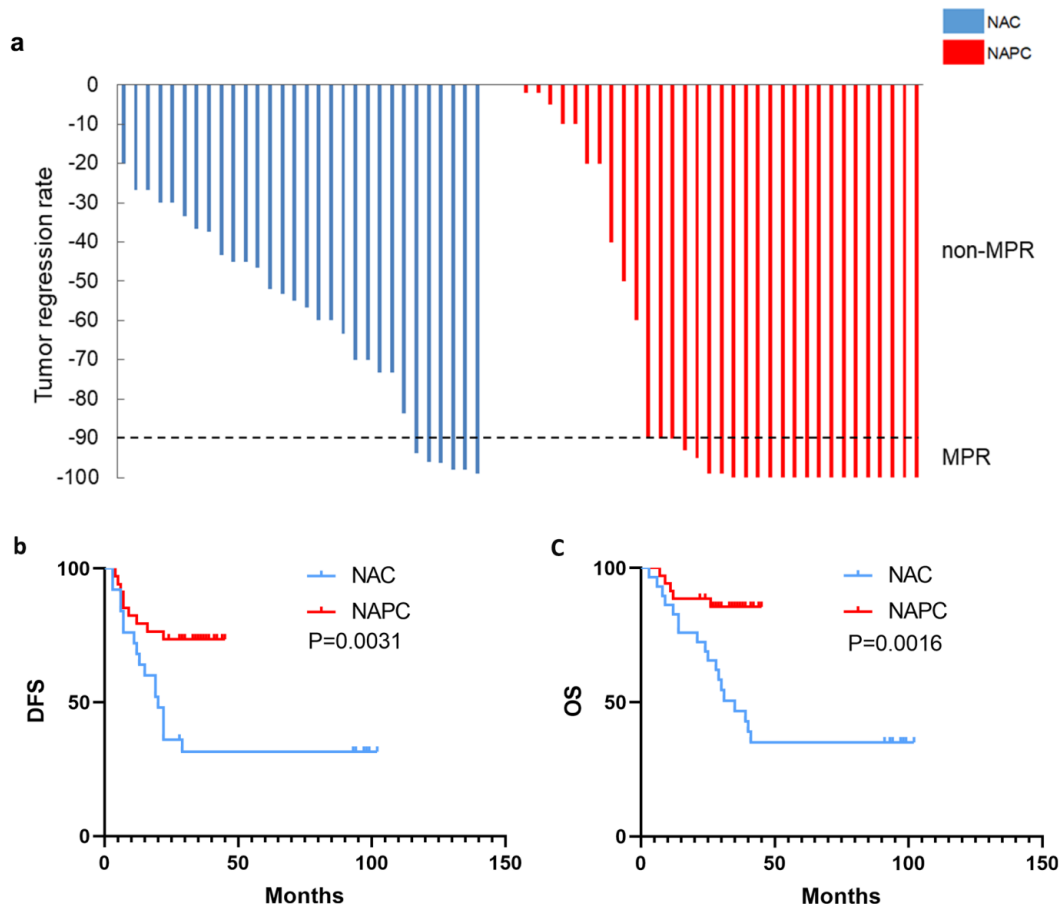

**Supplementary Figure 1. Pathologic response and prognosis of NSCLC patients treated with NAC or NAPC therapy.**

**a** Waterfall chart represented the pathological regression of each patient in two treatment regimens, with the horizontal dashed line indicating the threshold of MPR (90% regression). **b,c** Kaplan–Meier estimates of disease-free survival (DFS) and overall survival (OS) in the NAC and NAPC cohorts.

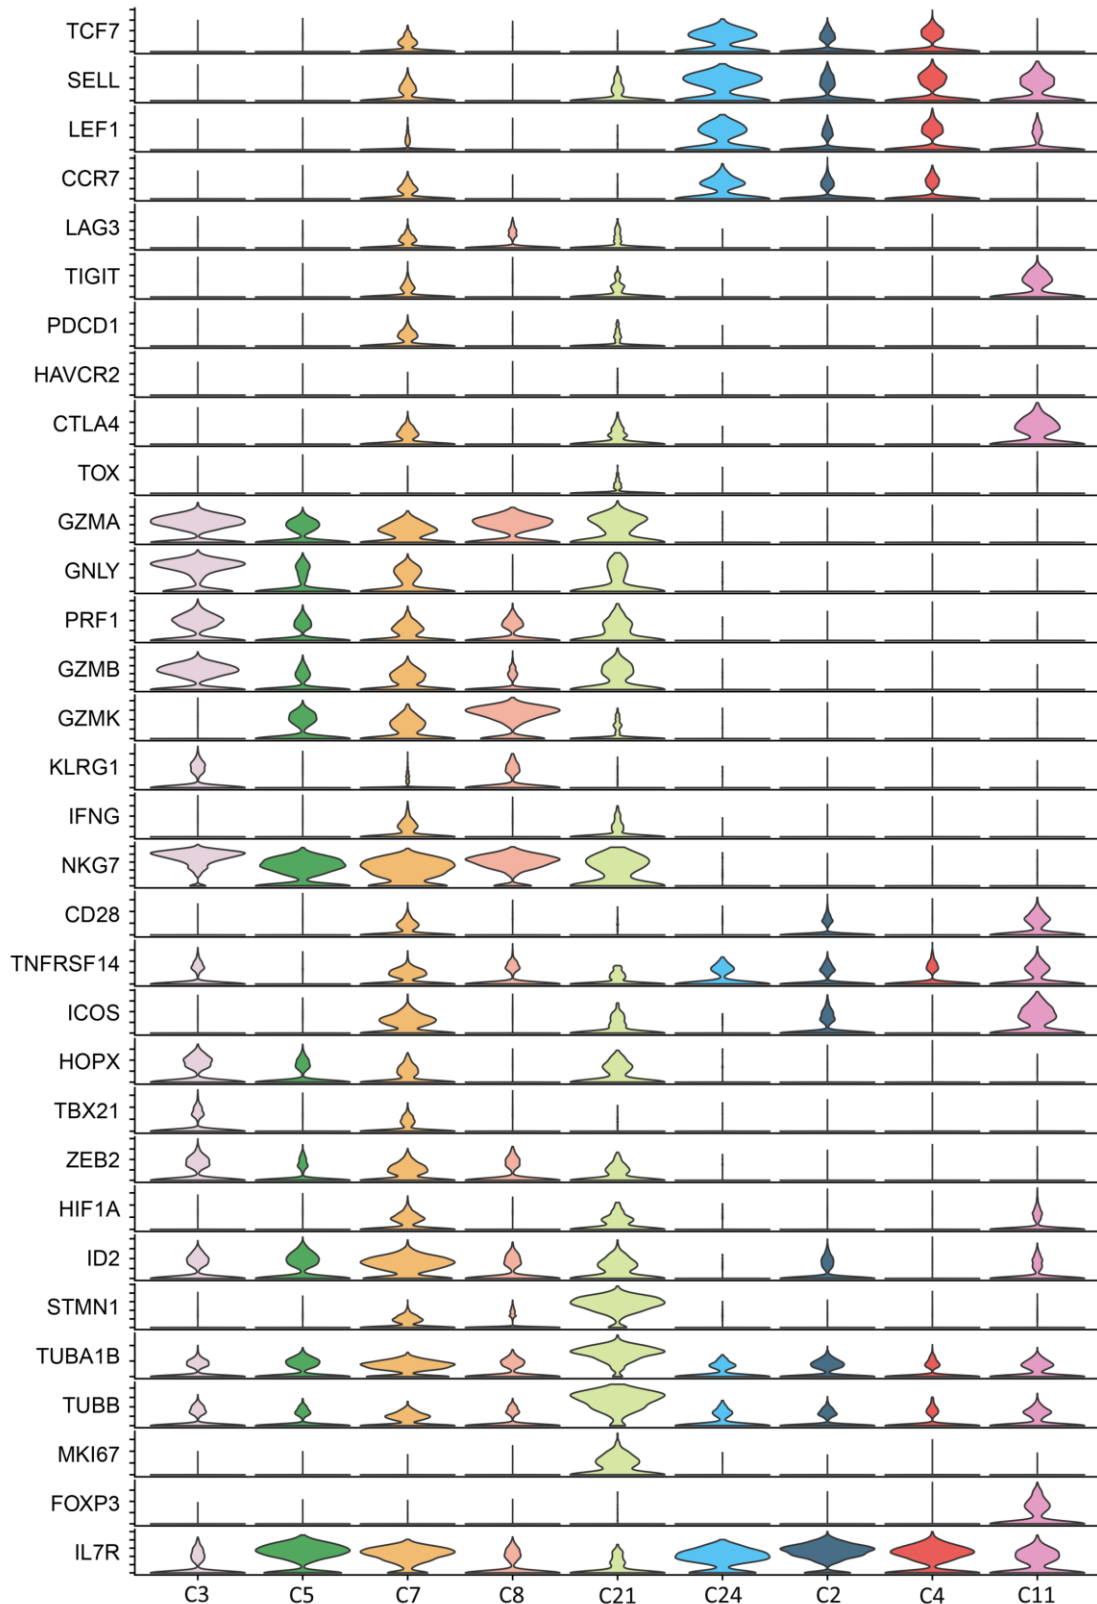

**Supplementary Figure 2. Violin map of cluster signature genes of CD8<sup>+</sup> T-cell and CD4<sup>+</sup> T-cell clusters.**

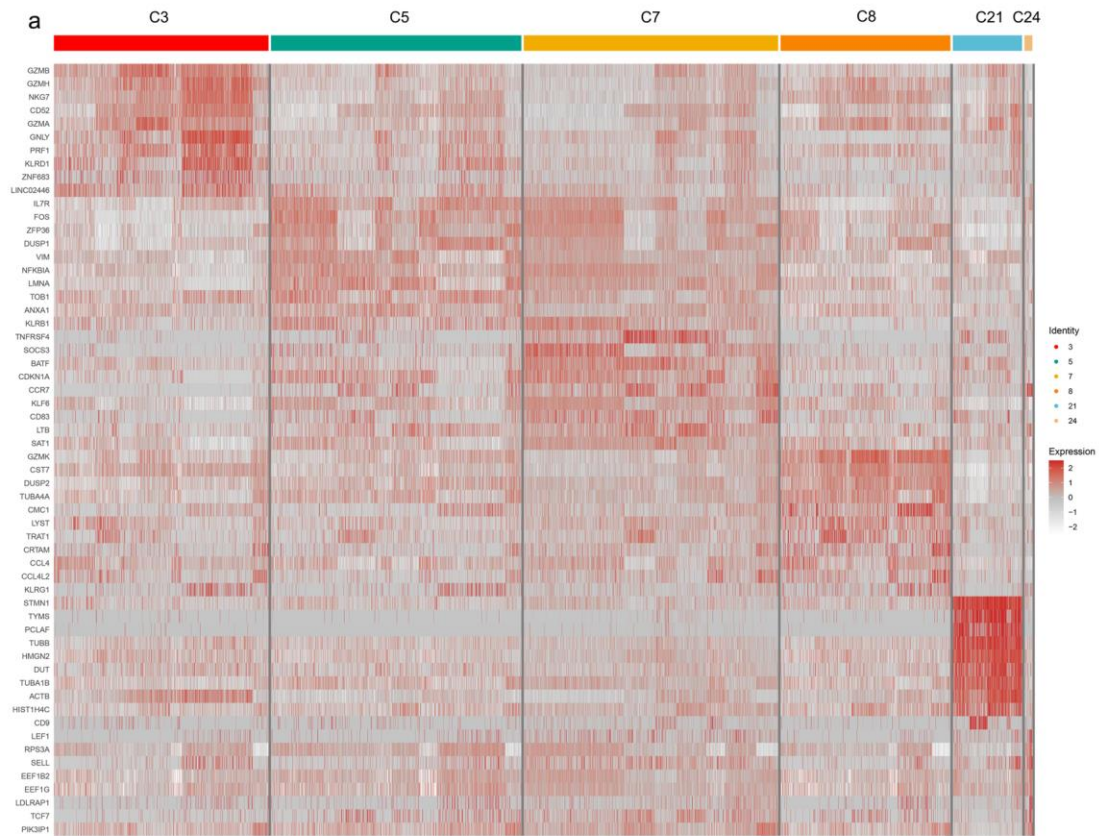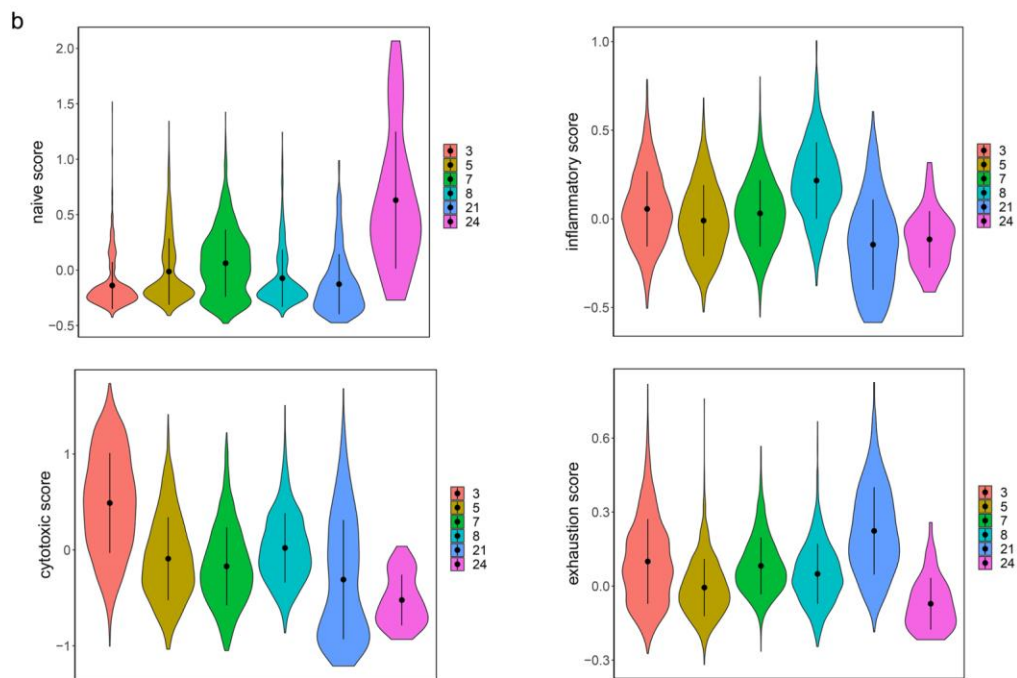

**Supplementary Figure 3. Clustering and nomenclature of CD8<sup>+</sup> T cells.**

**a** Heatmap showing the top10 marker genes of six CD8<sup>+</sup> T cell clusters. **b** The violin showing the indicated functional scores of CD8<sup>+</sup> T cell subsets estimated by the “AddModuleScore” function in Seurat. Data are presented as mean  $\pm$ SD.

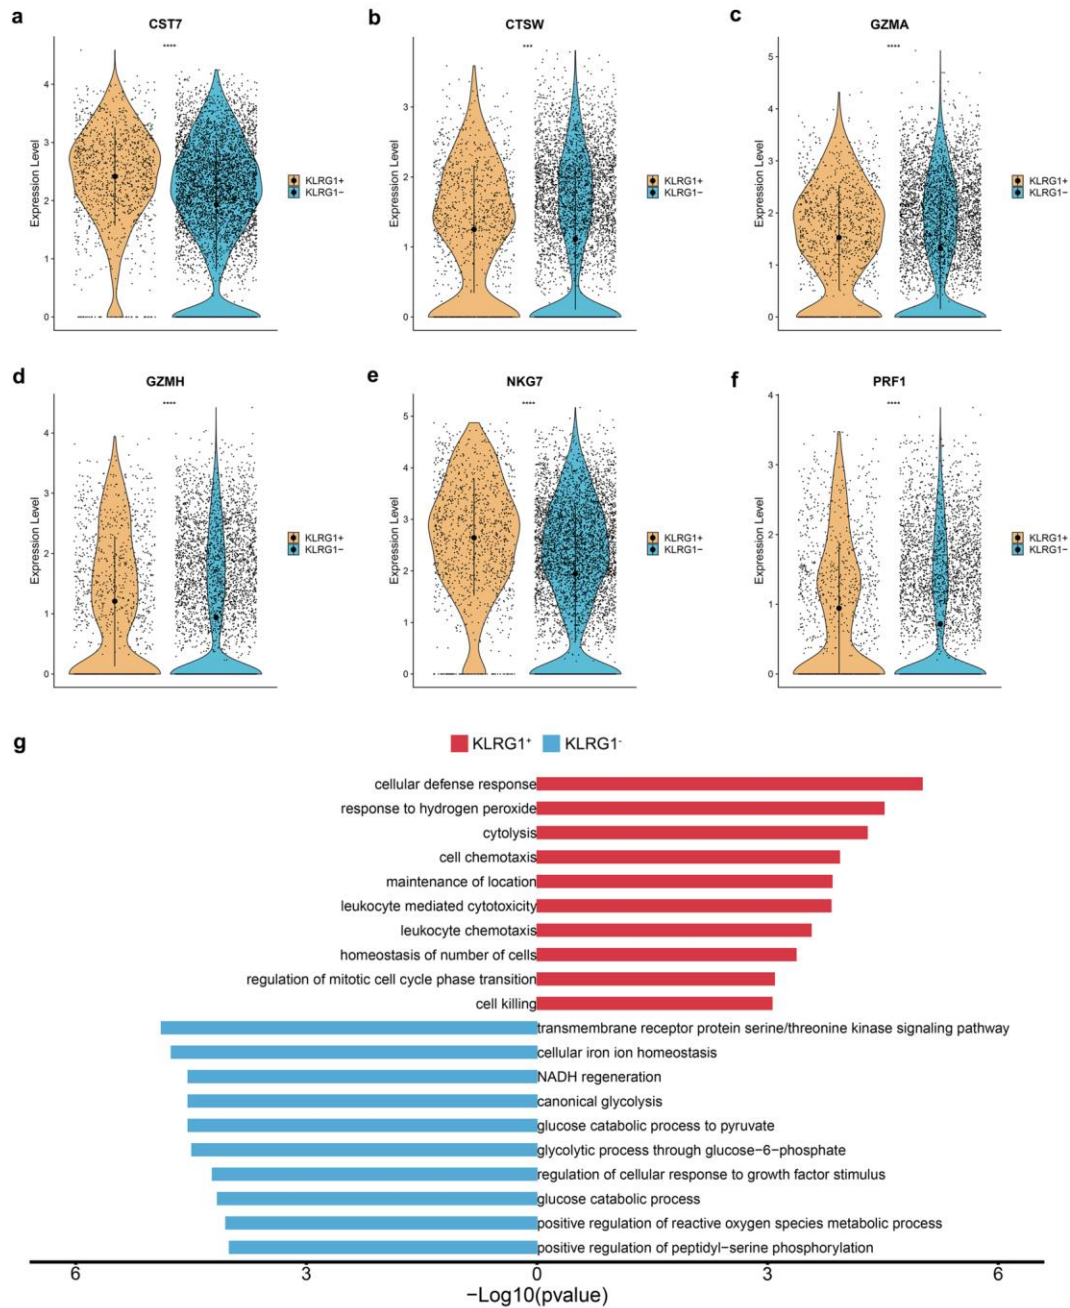

**Supplementary Figure 4. Comparison of DEGs and GO functional enrichment analysis between KLRG1<sup>+</sup> and KLRG1<sup>-</sup> CD8 T cells.**

**a-f** Violin map of cytotoxic genes between KLRG1<sup>+</sup> and KLRG1<sup>-</sup> CD8 T cells. **g** GO functional enrichment analysis of KLRG1<sup>+</sup> and KLRG1<sup>-</sup> CD8 T cells.



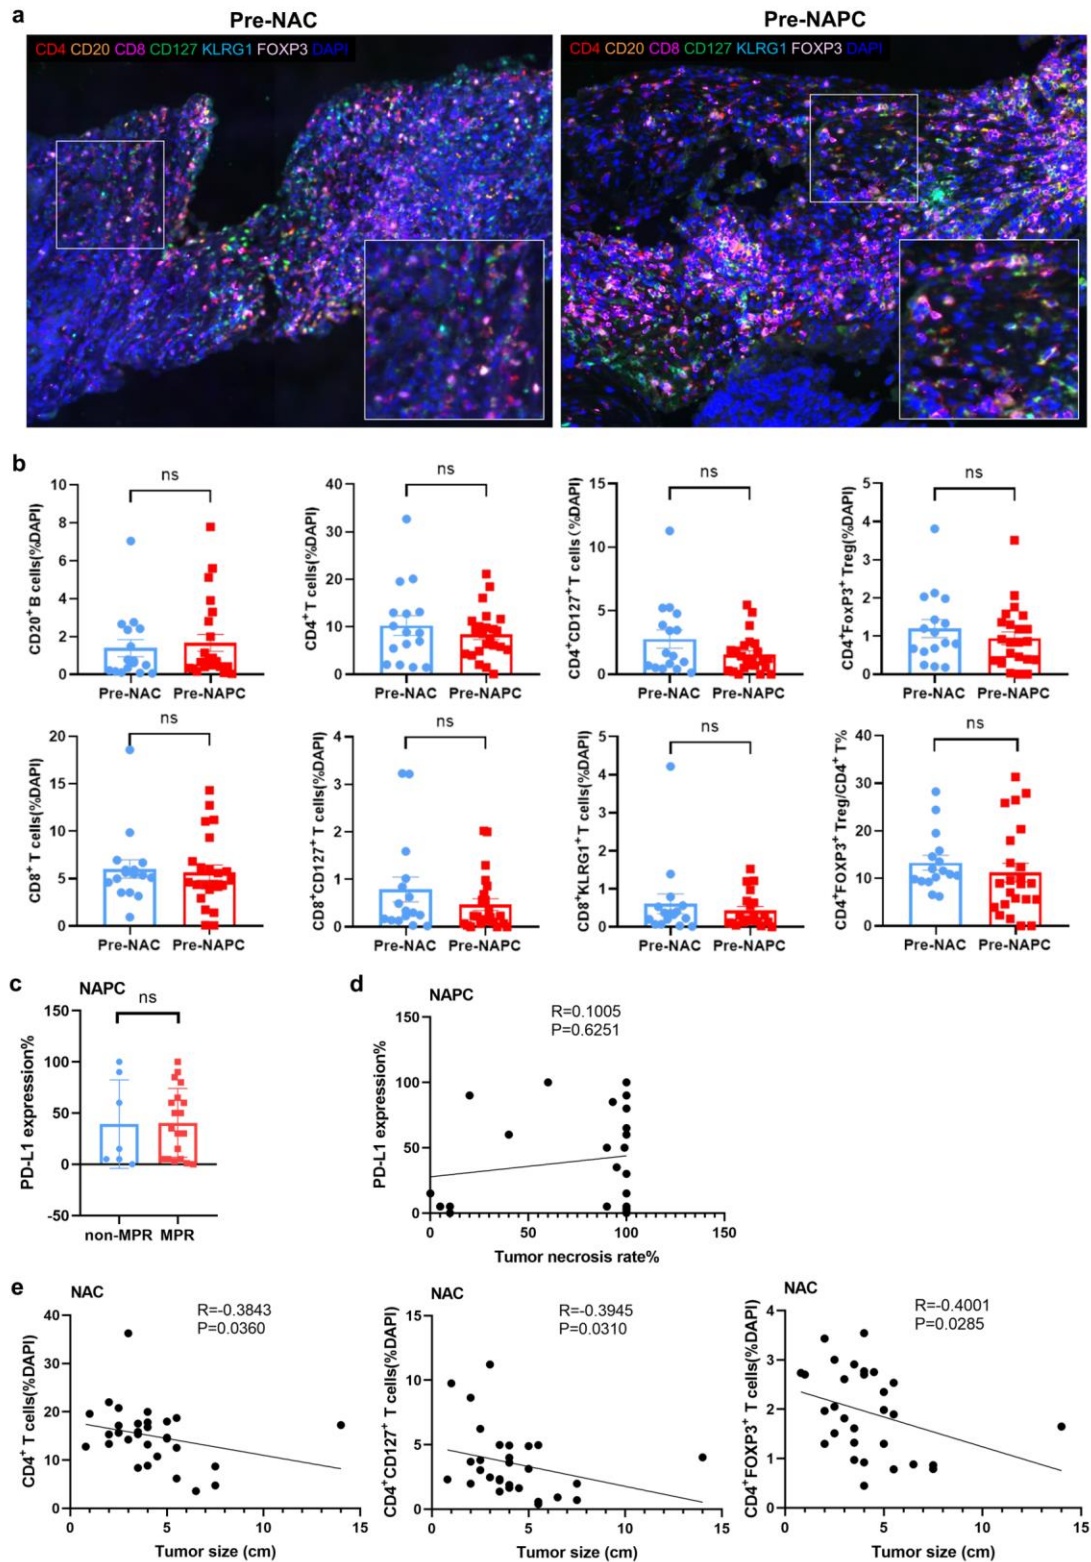

**Supplementary Figure 5. Pre-treatment PD-L1 expression and TILs infiltration levels did not correlate with therapy response.**

**a** Representative mIHC staining images of pre-NAC and pre-NAPC samples (Image under 10X). **b** Comparison of CD20<sup>+</sup> B cells, CD4<sup>+</sup> T cells, CD4<sup>+</sup>CD127<sup>+</sup> T cells, CD8<sup>+</sup> T

cells, CD8<sup>+</sup>CD127<sup>+</sup> T cells, CD8<sup>+</sup>KLRG1<sup>+</sup> T cells, CD4<sup>+</sup>FoxP3<sup>+</sup> Tregs between pre-NAC and pre-NAPC samples. There was no difference in the infiltration of TILs between pre-NAC and pre-NAPC. Pre-NAC: n=16, Pre-NAPC: n=23; P values were determined by Mann-Whitney test, ns: not significant. **c** Comparison of pre-treatment PD-L1 expression in non-MPR and MPR patients of NAPC. **d** Spearman correlation of pre-treatment PD-L1 and tumor necrosis rate. **e** Spearman correlation of tumor size and tumor-infiltrating CD4<sup>+</sup> T cells, CD4<sup>+</sup>CD127<sup>+</sup> T cells and Treg cells in NAC. Data are presented as mean  $\pm$ SD.



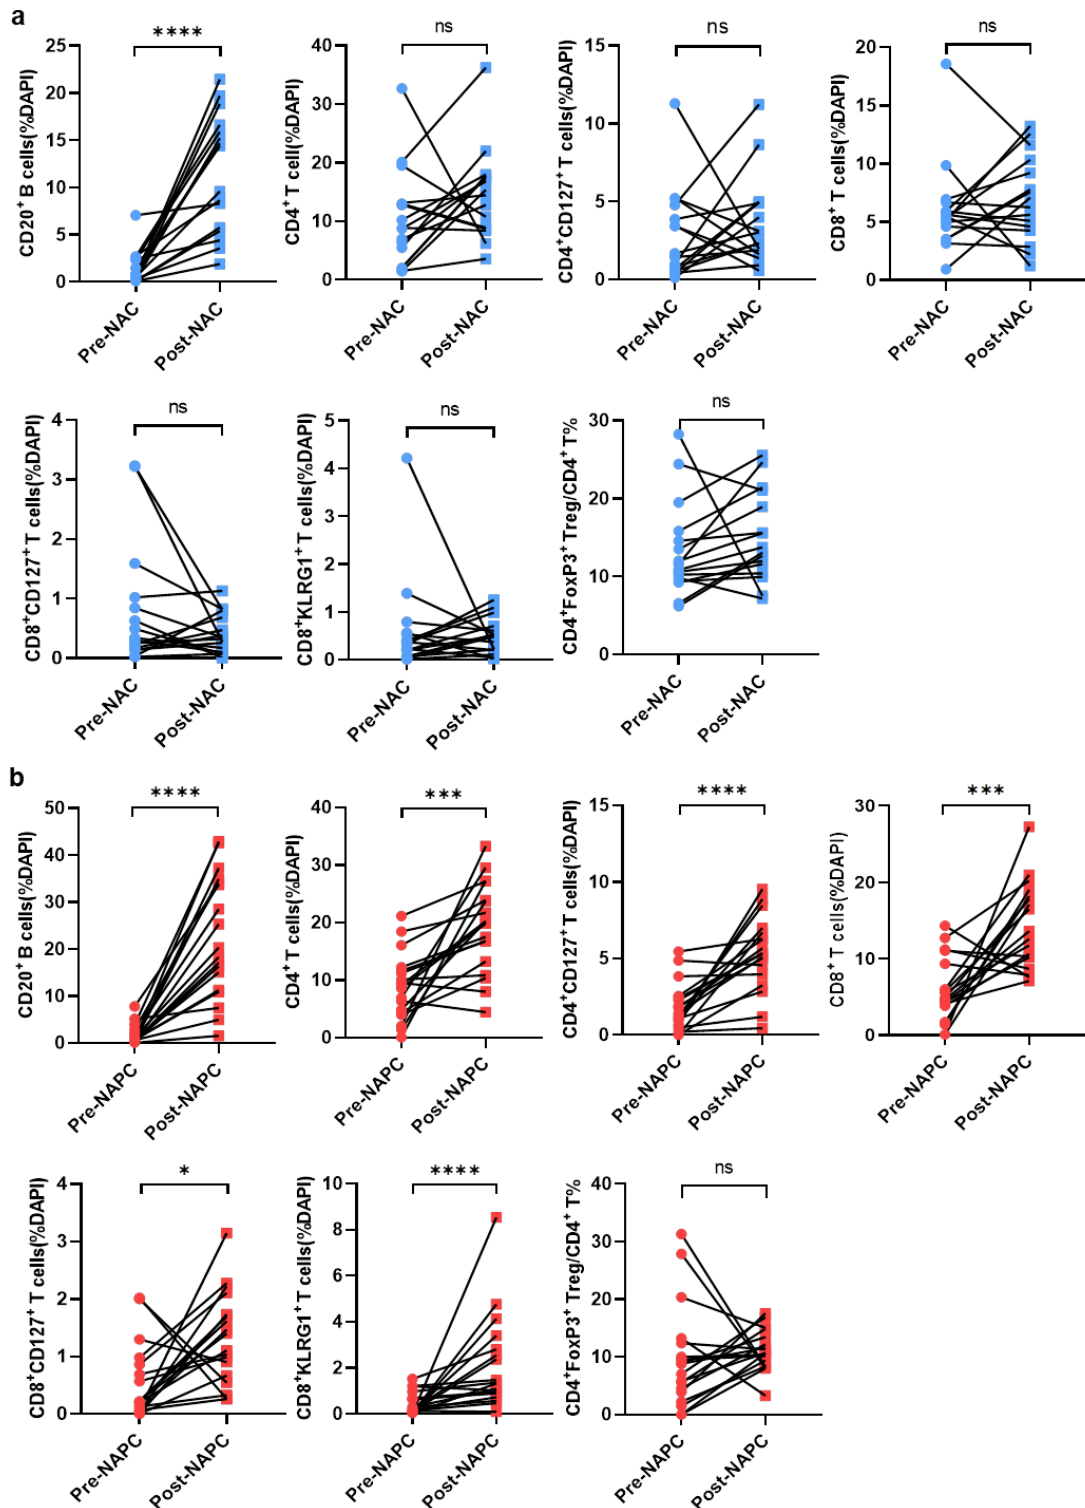

**Supplementary Figure 6. Dynamic changes of TILs between self-matched tumors before and after neoadjuvant therapy with NAC or NAPC. NAC: n=16; NAPC: n=18. P values were determined by Wilcoxon matched-pairs signed rank test, \* P < 0.05; \*\*\* P<0.001; \*\*\*\* P < 0.0001; ns: not significant.**

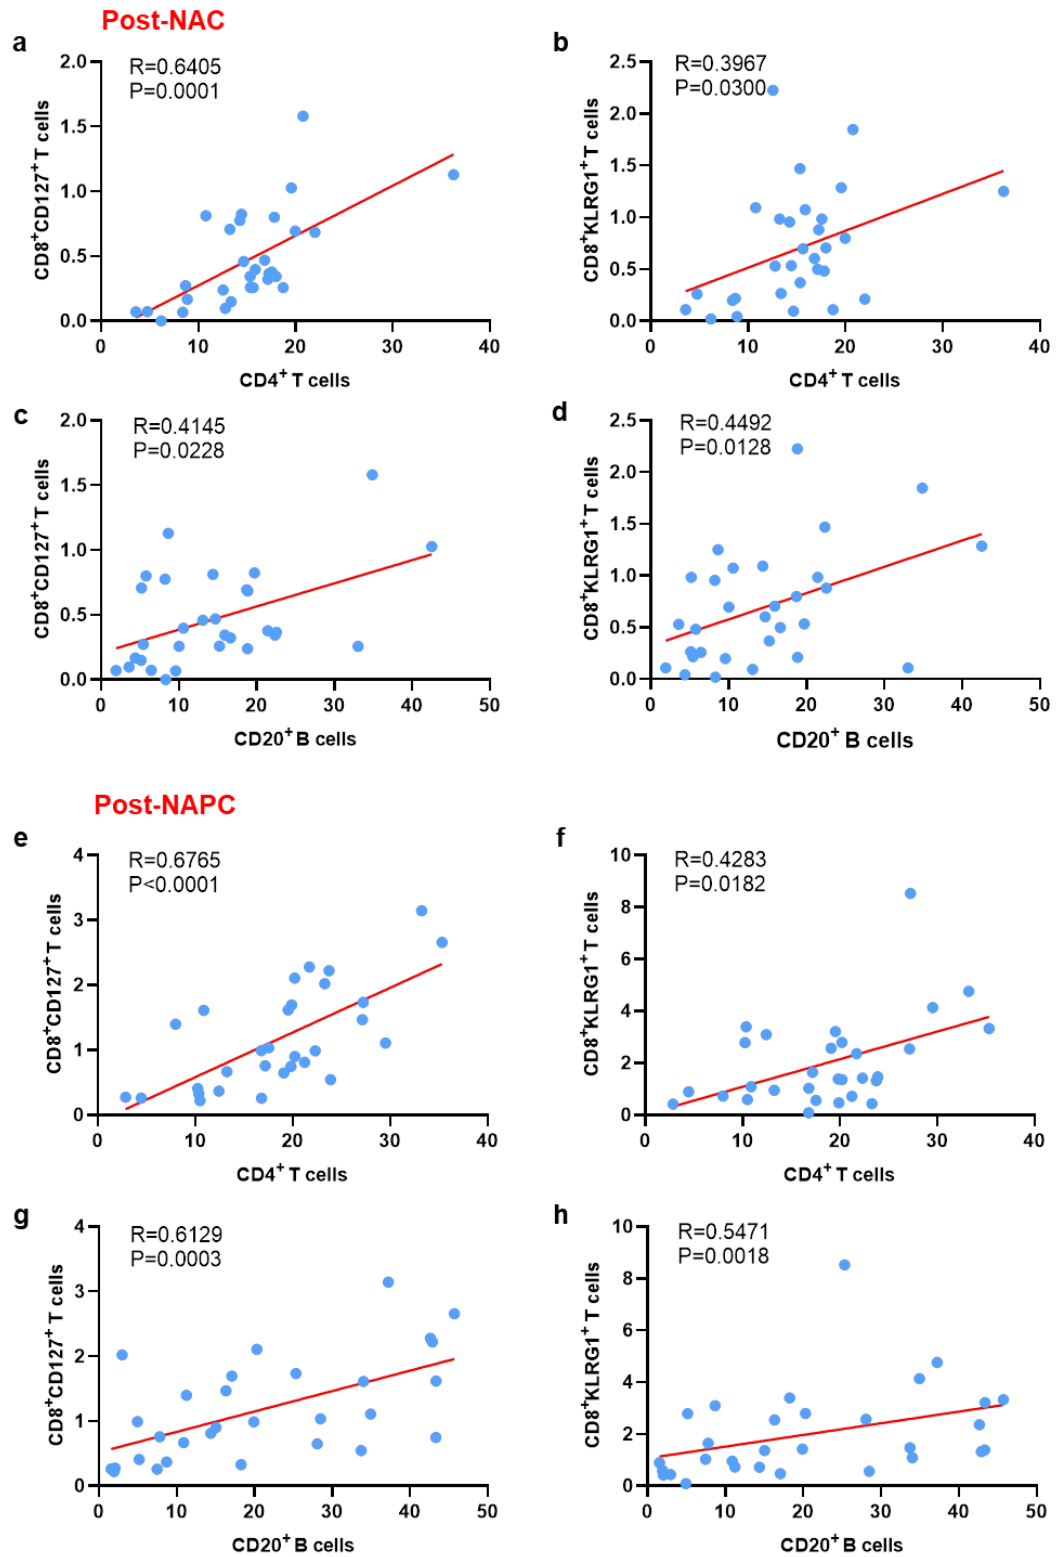

**Supplementary Figure 7. Spearman correlation of  $CD20^+$  B cells and  $CD4^+$  T cells with  $CD127^+$  and  $KLRG1^+$   $CD8^+$  T cells in post-NAC and post-NAPC tumor tissues.**

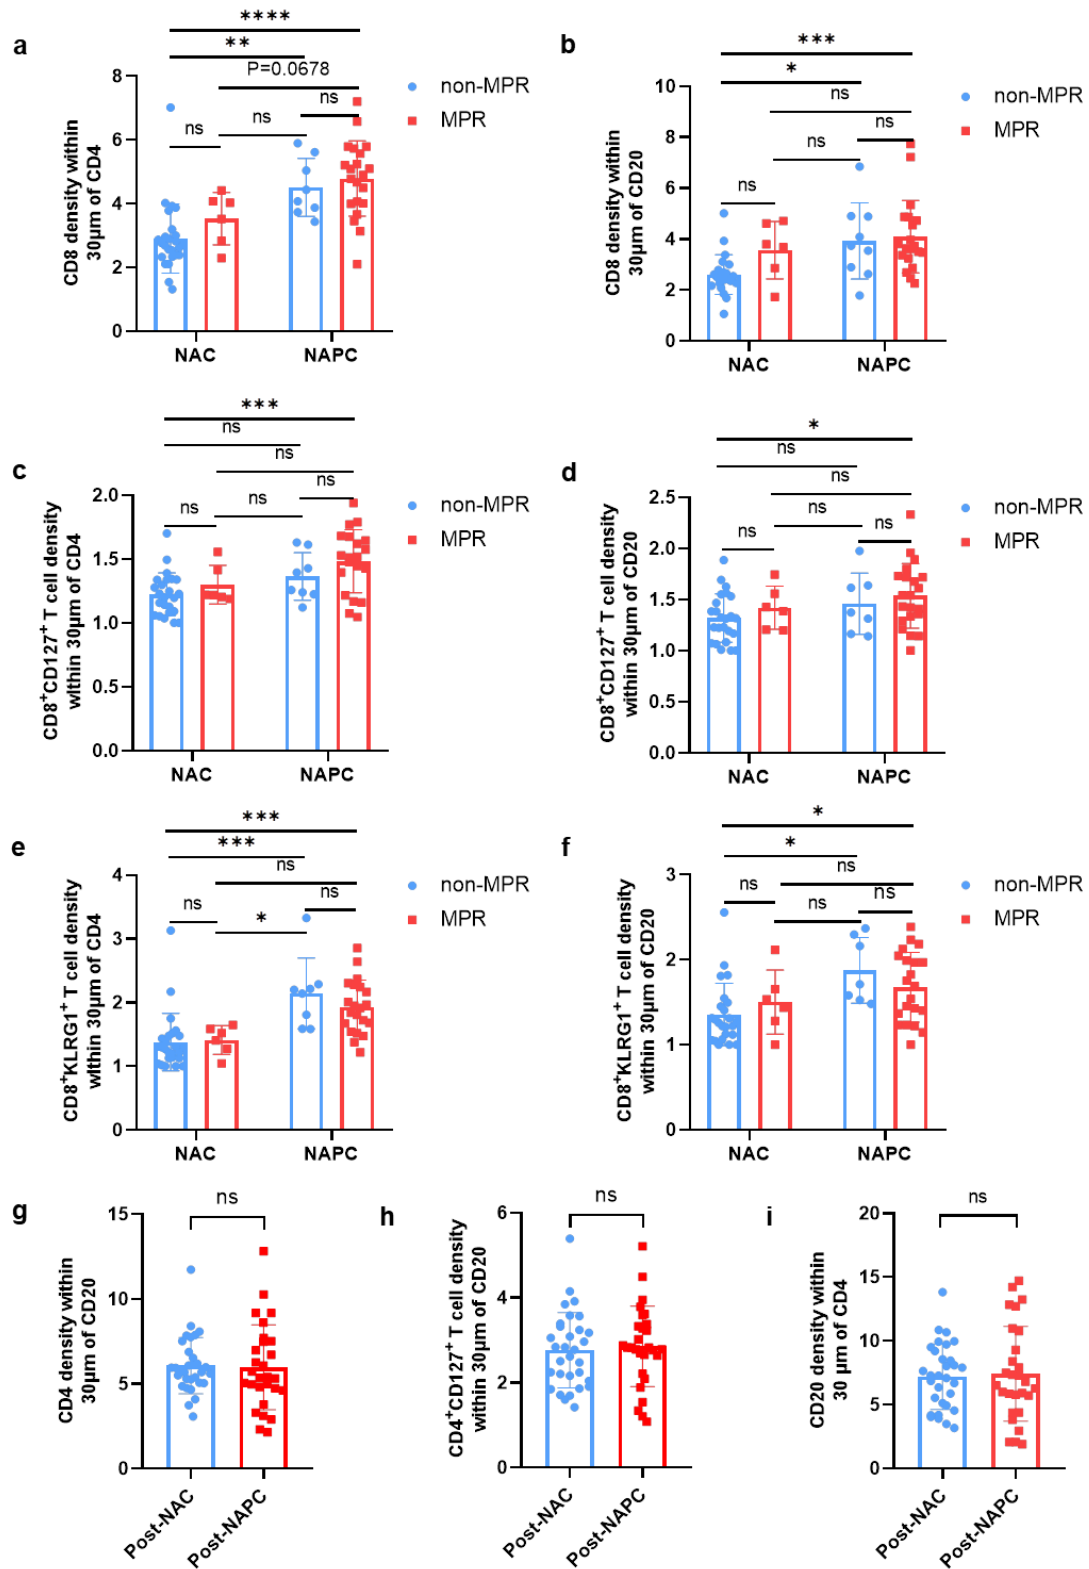

**Supplementary Figure 8. Relationship between spatial distribution patterns and pathological response in post-treatment tumor tissues.**

a-f Relationship between the spatial distribution of CD8<sup>+</sup> T, CD8<sup>+</sup>CD127<sup>+</sup> and

CD8<sup>+</sup>KLRG1<sup>+</sup> T cells with CD4<sup>+</sup> T and CD20<sup>+</sup> B cells and pathological responses. post-NAC-NR n=24, post-NAC-R n=6, post-NAPC-NR n=10, post-NAPC-R n=20; P values were determined by two-way ANOVA with multiple comparisons, \* P < 0.05; \*\* P<0.01; \*\*\* P<0.001; \*\*\*\* P < 0.0001; ns: not significant. **g-i** The spatial distribution between CD4<sup>+</sup> T cells and CD20<sup>+</sup> B cells showed no difference in post-NAC and post-NAPC. Post-NAC: n=30, Post-NAPC: n=30. Data are presented as mean ±SD. P values were determined by Mann-Whitney test, ns: not significant.

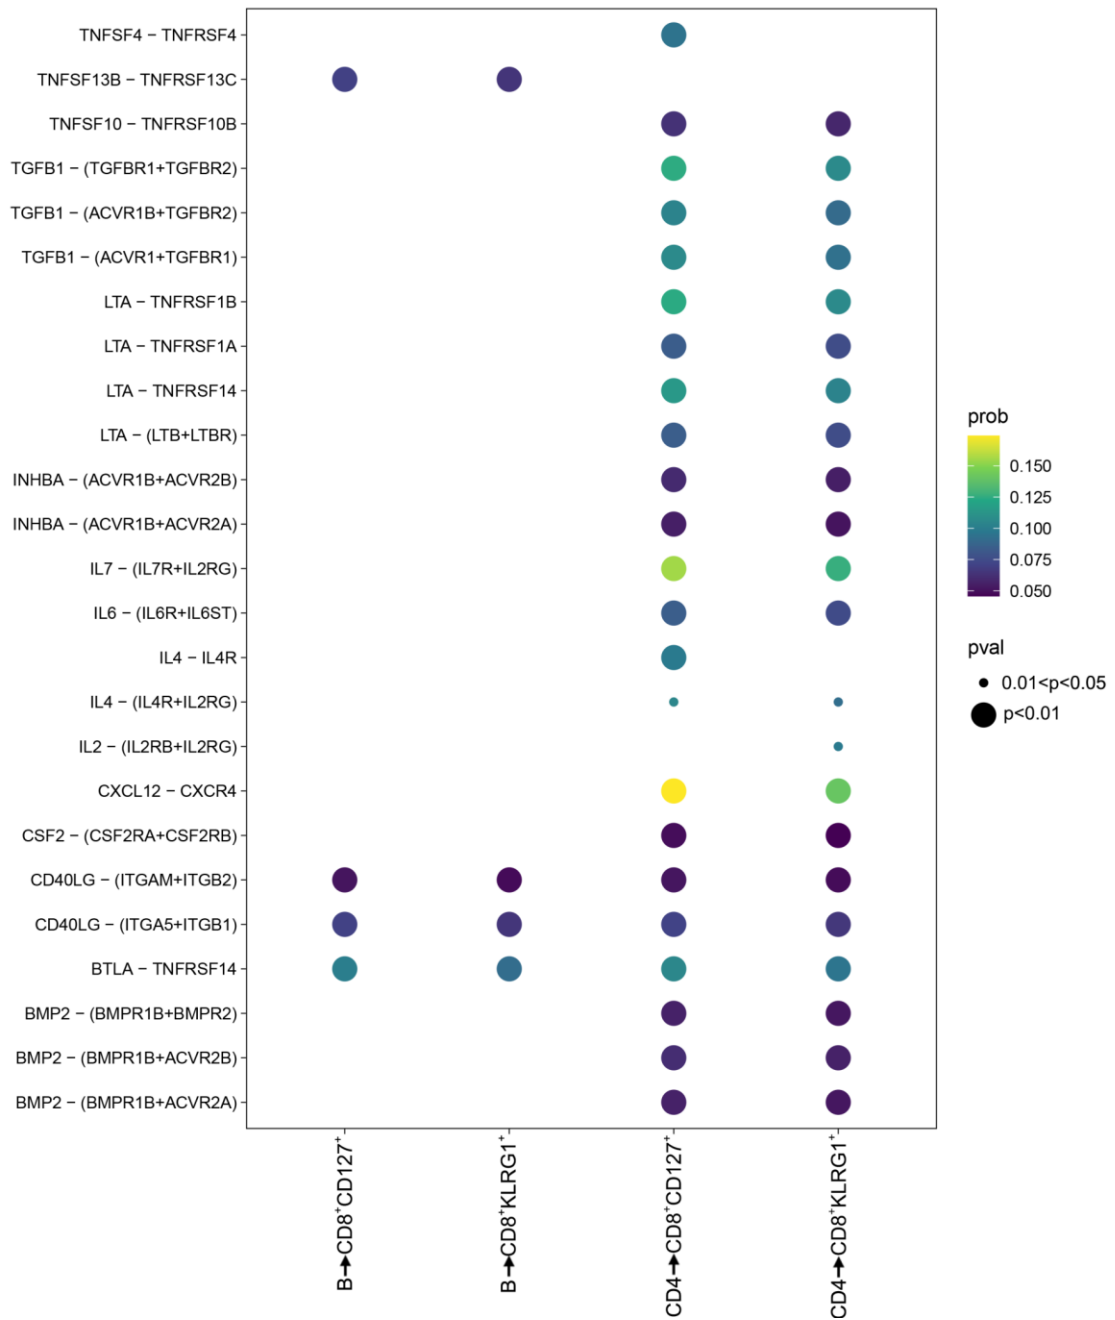

**Supplementary Figure 9. Potential ligand-receptor pairs predicted by CellChat for CD4<sup>+</sup> T or CD20<sup>+</sup> B cells interacting with CD8<sup>+</sup>CD127<sup>+</sup> and CD8<sup>+</sup>KLRG1<sup>+</sup> T cells.**

**Pre-NAC**

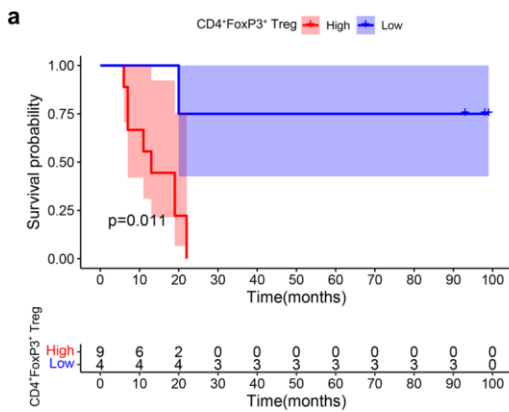

**Pre-NAPC**

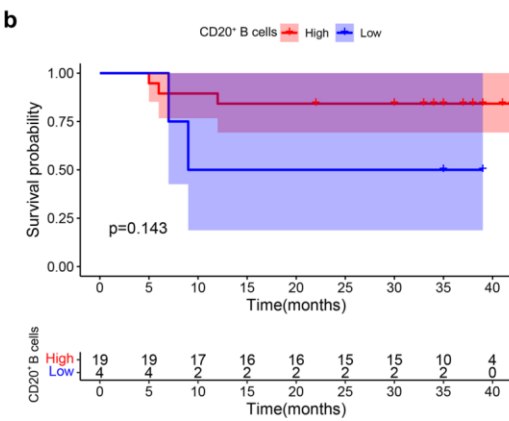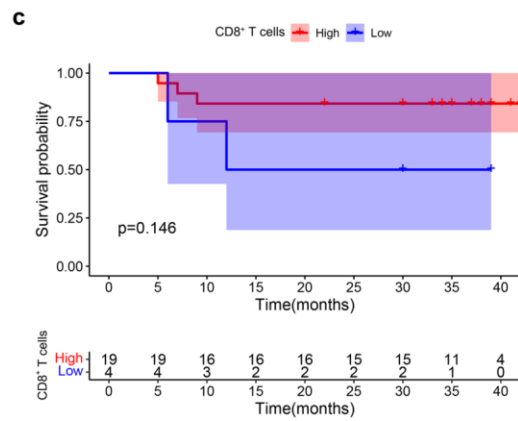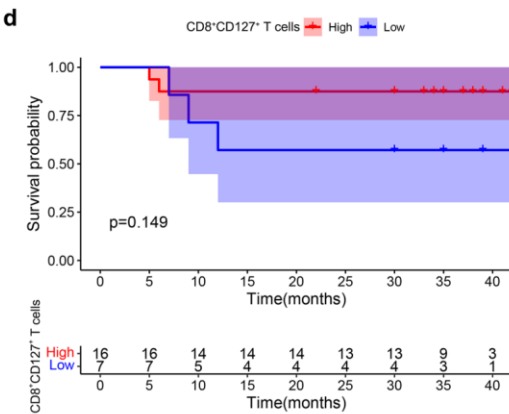

**Supplementary Figure 10. Correlation of pre-treatment TILs with clinical outcome.**

**a** Kaplan–Meier estimates of DFS for NAC patients according to the pre-treatment level of CD4<sup>+</sup>FoxP3<sup>+</sup> T cells. **b-d** Kaplan–Meier estimates of DFS for NAPC patients according to the pre-treatment level of CD20<sup>+</sup> B cells, CD8<sup>+</sup> T cells, and CD8<sup>+</sup>CD127<sup>+</sup> T cells. Patients were divided into high and low groups using the package “survminer” of R software.
